# Supplementary material for: Mechanistic insight into catalytic conversion of methane on a Sr2Fe1.5Mo0.5O6−δ perovskite anode: a combined EIS-DRT, DFT and TPSR investigation
Source: Royal Society of Chemistry journal article supplement (doi:10.1039/d3ta03391k), 2023-01-01
Supplement: d3ta03391k1.pdf [file d3ta03391k1.pdf]

## **Mechanistic insight into catalytic conversion of methane on $\text{Sr}_2\text{Fe}_{1.5}\text{Mo}_{0.5}\text{O}_6$ perovskite anode: A combined EIS-DRT, DFT and TPSR investigation**

*Zongying Han*<sup>a,\*</sup>, *Hui Dong*<sup>b</sup>, *Yuhao Wang*<sup>c</sup>, *Yanru Yang*<sup>a</sup>, *Hao Yu*<sup>a</sup>, *Zhibin Yang*<sup>d,\*\*</sup>

<sup>a</sup> College of Energy Storage Technology, Shandong University of Science and Technology, Qingdao 266590, China

<sup>b</sup> College of Chemical and Biological Engineering, Shandong University of Science and Technology, Qingdao 266590, China

<sup>c</sup> Department of Mechanical and Aerospace Engineering, The Hong Kong University of Science and Technology, Clear Water Bay, Hong Kong SAR, China

<sup>d</sup> Research Center of Solid Oxide Fuel Cell, China University of Mining & Technology-Beijing, Beijing, 100083, China

---

\* Corresponding author. Email address: [hzy5315@163.com](mailto:hzy5315@163.com) (Z.Y. Han)

\*\* Corresponding author. Email address: [yangzhibin0001@163.com](mailto:yangzhibin0001@163.com) (Z.B. Yang)

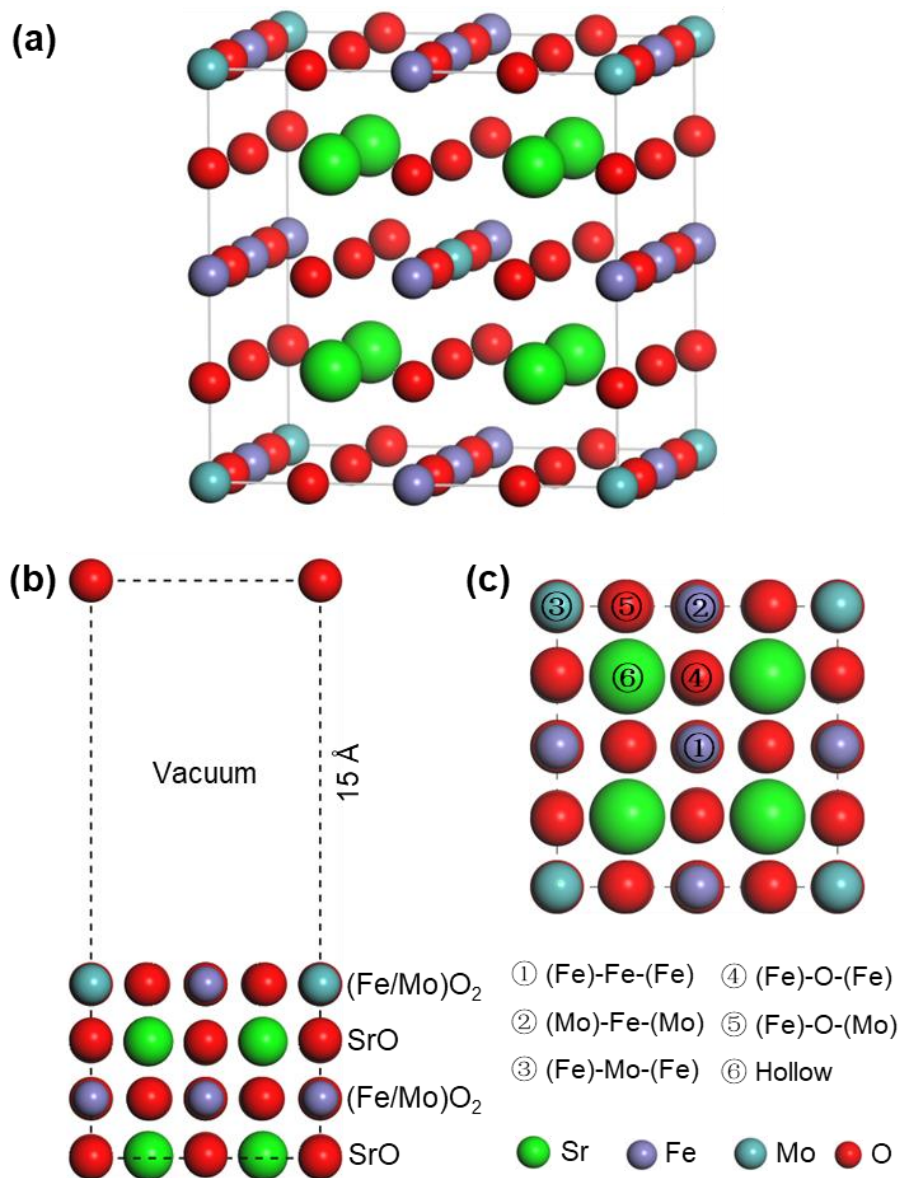

**Fig. S1** SFMO bulk model (s), SFMO (001) surface model (b) and potential adsorption sites (c) on SFMO (001) surface.

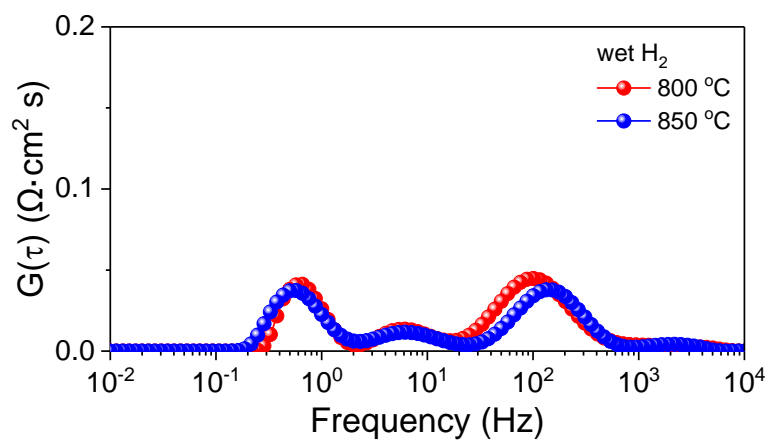

**Fig. S2** DRT curves of the SFM/LSGM/LSCF cell in wet hydrogen fuel.

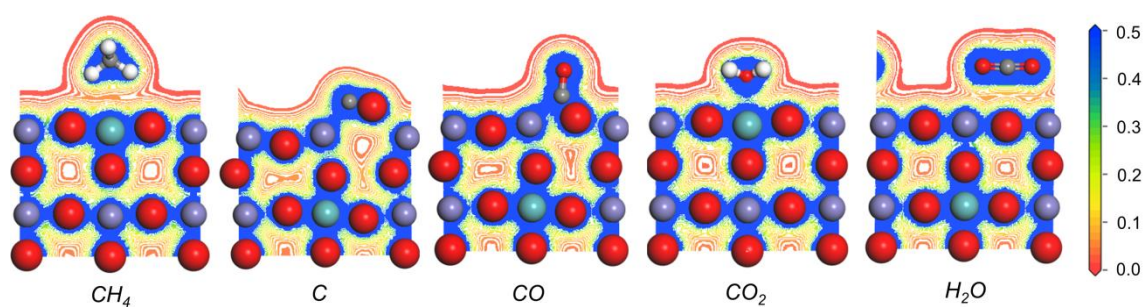

**Fig. S3** Electron density distribution in the most stable adsorption configurations of the key species on SFMO (001) surface. Electron density is given in units of electrons per  $\text{\AA}^3$ .

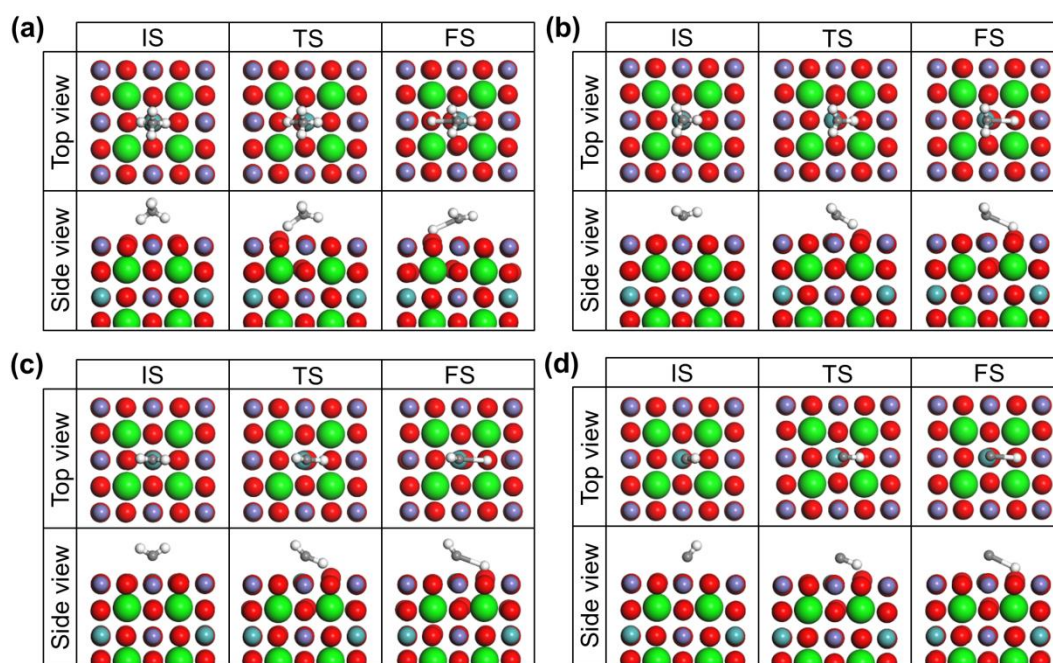

**Fig. S4** Geometry of the IS, TS and FS of methane cracking on the (Fe)-Mo-(Fe) site over SFMO surface. (a)  $\text{CH}_4 = \text{CH}_3 + \text{H}$ ; (b)  $\text{CH}_3 = \text{CH}_2 + \text{H}$ ; (c)  $\text{CH}_2 = \text{CH} + \text{H}$ ; (d)  $\text{CH} = \text{C} + \text{H}$ .

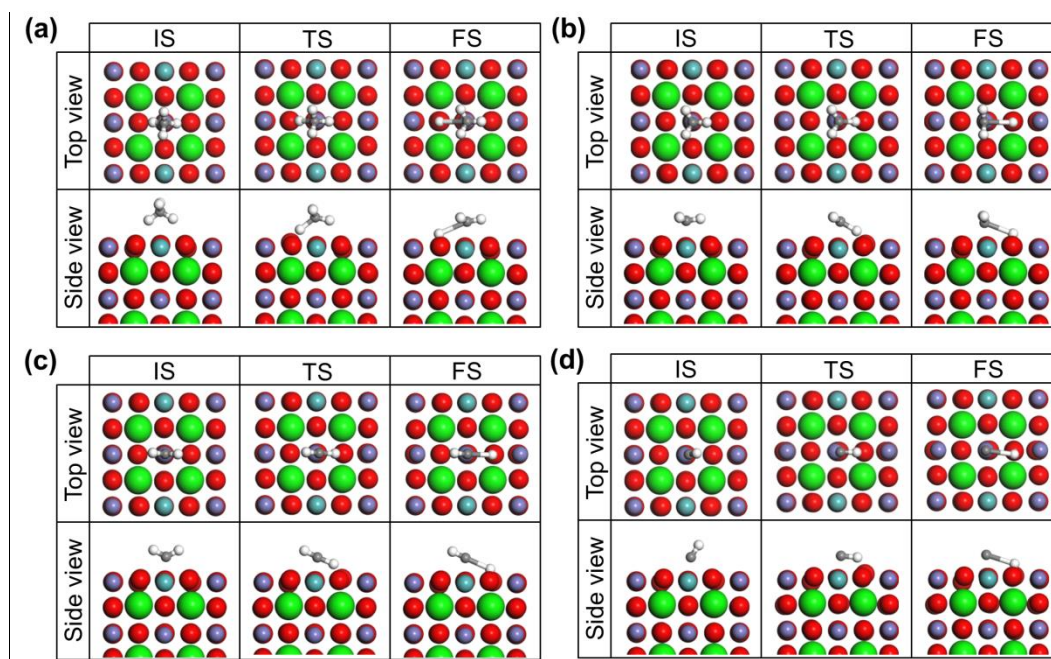

**Fig. S5** Geometry of the IS, TS and FS of methane cracking on the (Mo)-Fe-(Mo) site over SFMO surface. (a)  $\text{CH}_4 = \text{CH}_3 + \text{H}$ ; (b)  $\text{CH}_3 = \text{CH}_2 + \text{H}$ ; (c)  $\text{CH}_2 = \text{CH} + \text{H}$ ; (d)  $\text{CH} = \text{C} + \text{H}$ .

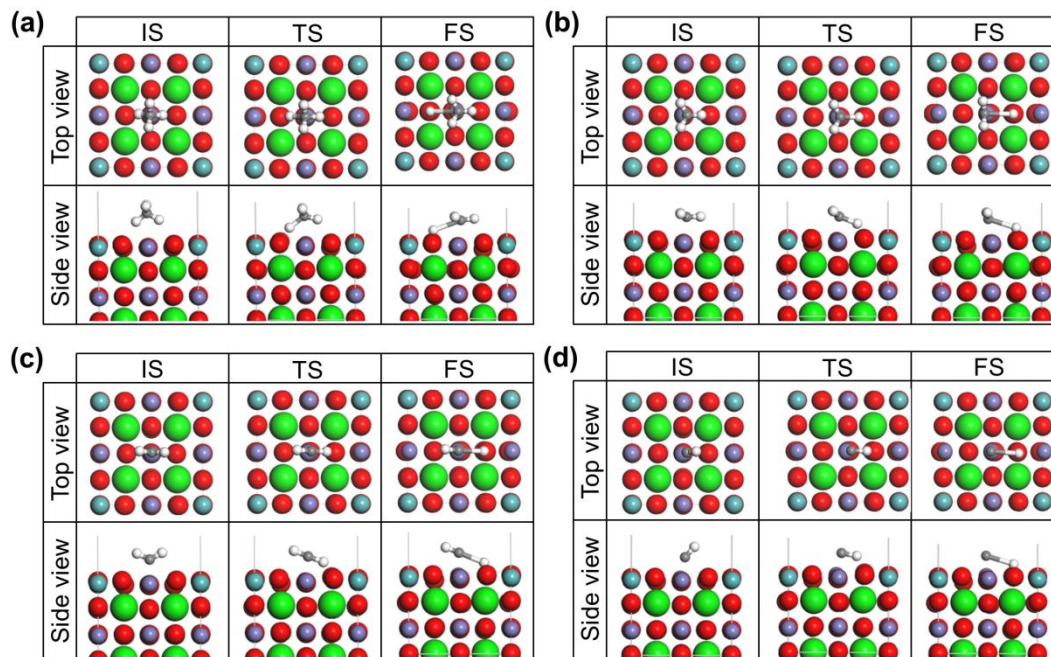

**Fig. S6** Geometry of the IS, TS and FS of methane cracking on the (Fe)-Fe-(Fe) site over SFMO surface. (a)  $\text{CH}_4 = \text{CH}_3 + \text{H}$ ; (b)  $\text{CH}_3 = \text{CH}_2 + \text{H}$ ; (c)  $\text{CH}_2 = \text{CH} + \text{H}$ ; (d)  $\text{CH} = \text{C} + \text{H}$ .

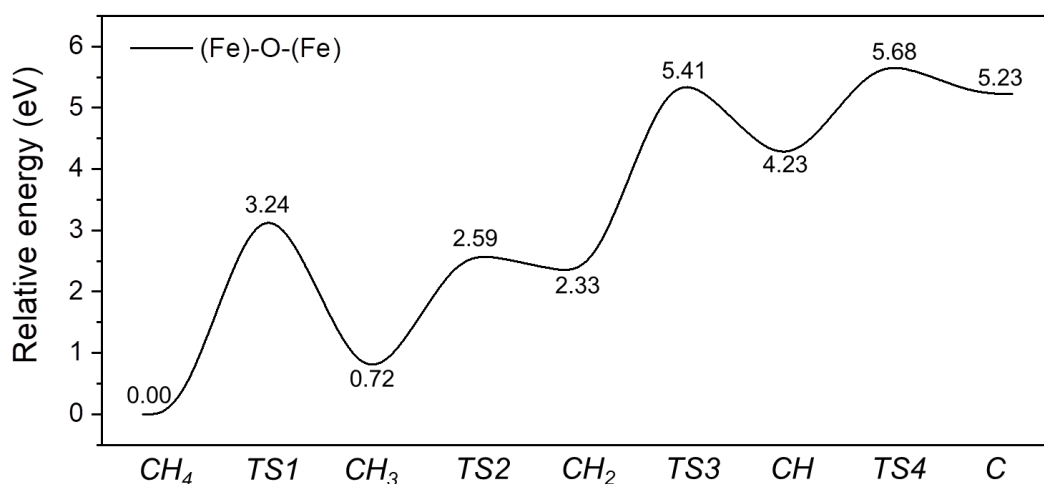

**Fig. S7** Energy profile of methane cracking on surface oxygen site of SFMO (001) surface.

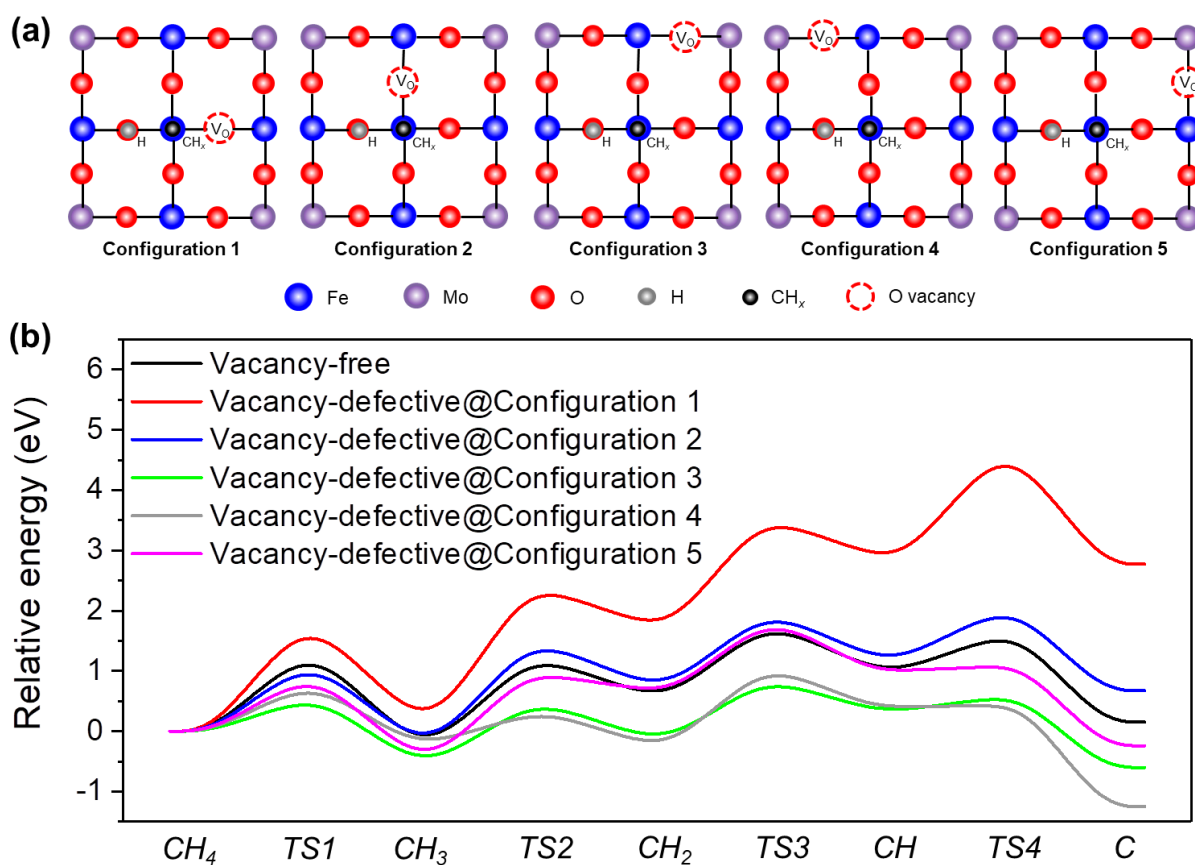

**Fig. S8** (a) Schematic diagram of five type of methane cracking configurations on the preferred surface (Fe)-Fe-(Fe) site of oxygen vacancy-defective SFMO surface; (b) Comparison of the energy profiles of methane cracking on the preferred surface (Fe)-Fe-(Fe) site with and without oxygen vacancy.

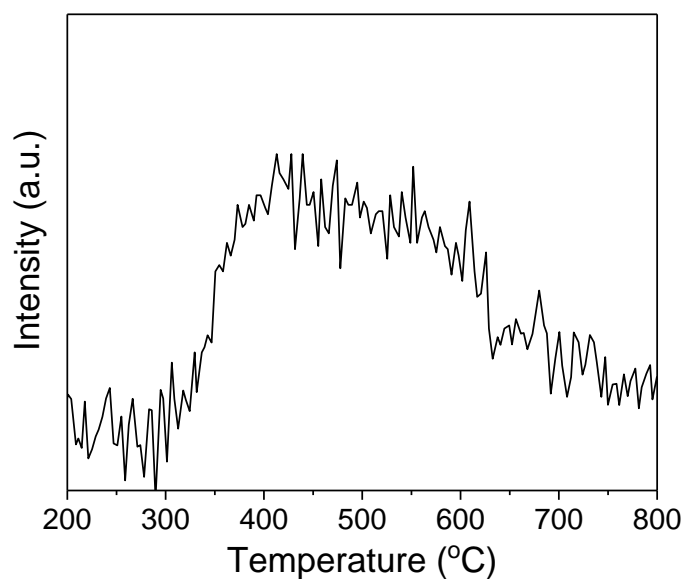

**Fig. S9** The CH<sub>4</sub> desorption profile over the as-synthesized SFMO perovskite.

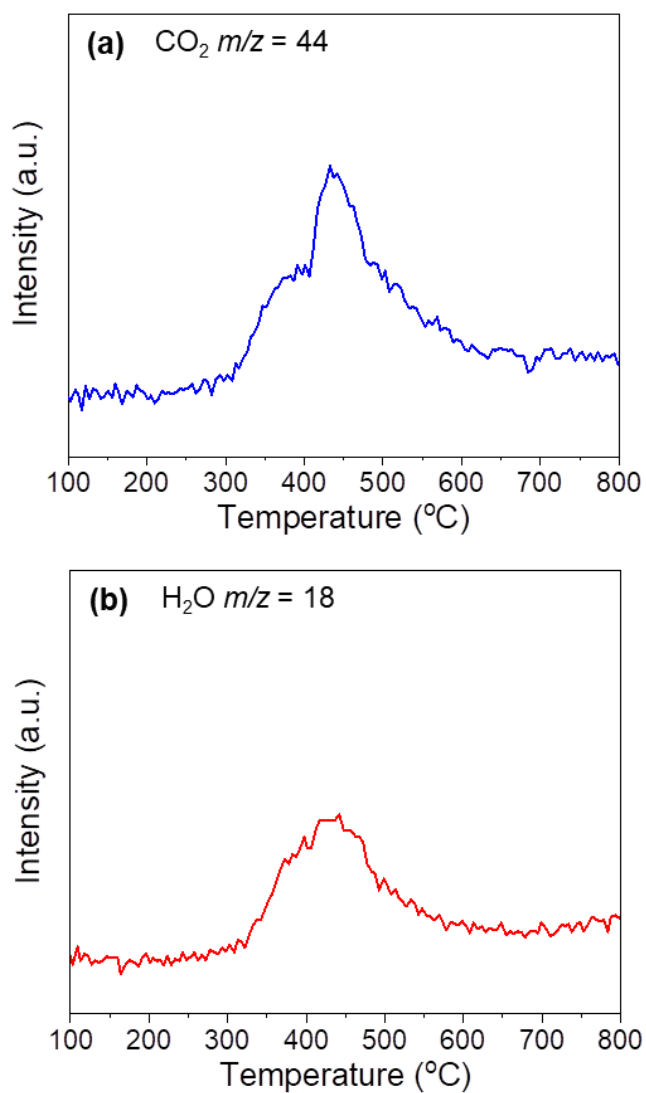

**Fig. S10** CH<sub>4</sub>-TPSR profiles corresponding to the reaction of CH<sub>4</sub> and lattice oxygen over Ni-YSZ as function of temperature.

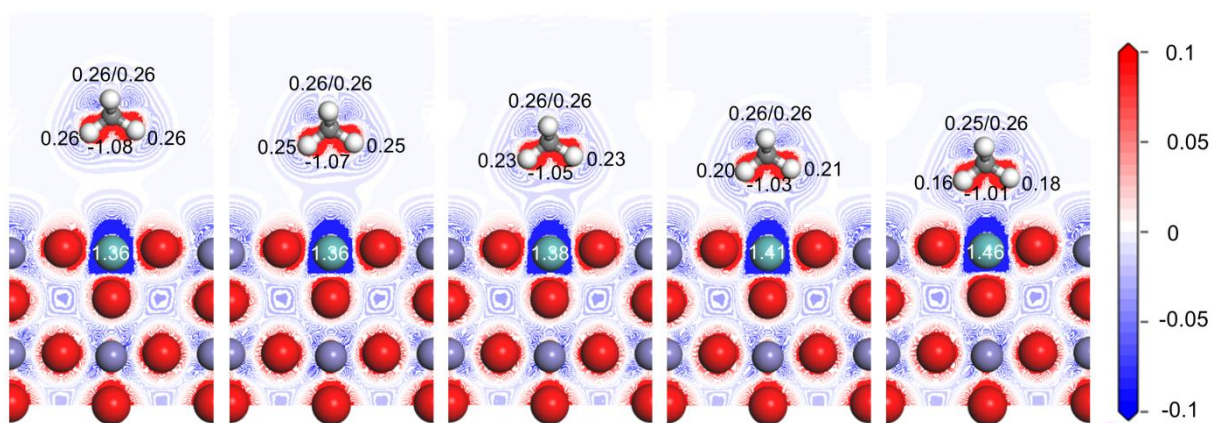

**Fig. S11** Electron density differences as the methane molecule approaches the surface given in units of electrons per  $\text{\AA}^3$ . In this plot a loss of electrons is indicated in blue, while electron enrichment is indicated in red. Inserted values represent the Mulliken charge of H and C atoms in  $\text{CH}_4$  molecule and the beneath Mo atom on the surface.
